# Supplementary material
Source: Springer Nature journal article supplement (https://www.springermedizin.de/resource/supplementary/13051_2010_120_MOESM3_ESM.pdf/9669980)

**A**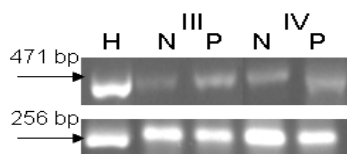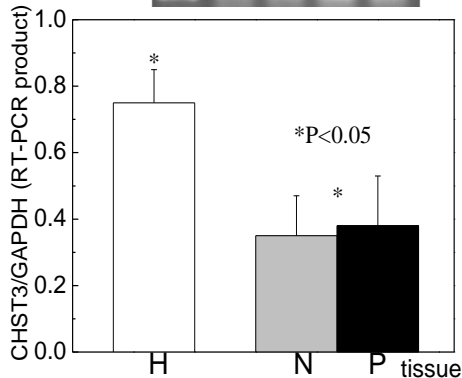**B**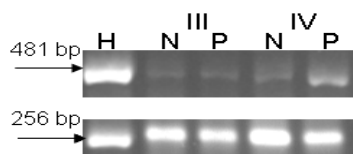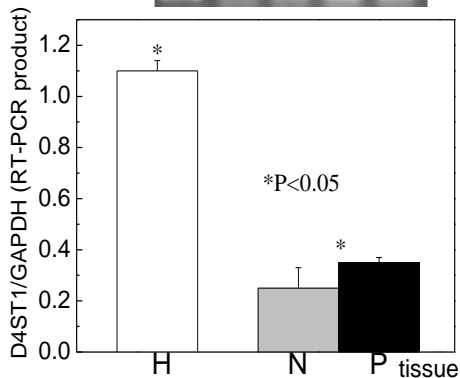**C**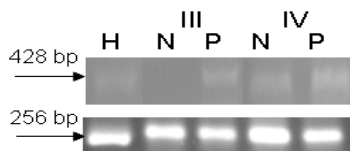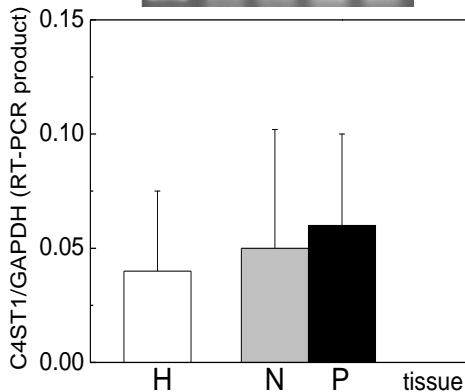**D**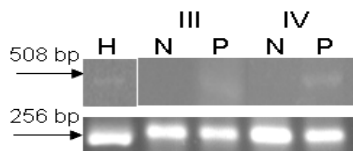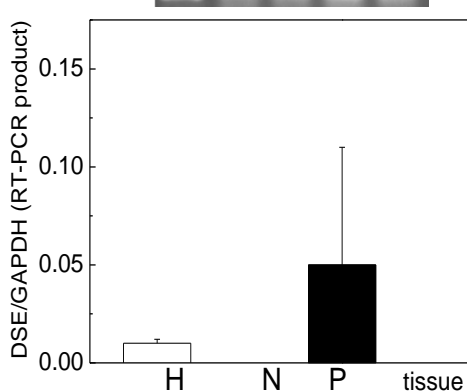

Supplement: MOESM3 [file 9669980]
